# Supplementary material for: Norcorrole as a Delocalized, Antiaromatic System
Source: PubMed Central journal article supplement (PMC6425022; doi:10.1038/s41598-019-39972-y), 2019-03-19
Supplement: 41598_2019_39972_MOESM1_ESM.pdf [file 41598_2019_39972_MOESM1_ESM.pdf]

## Supporting information

### Norcorrole As an Example of A Delocalized, Antiaromatic System

Jeanet Conradie,\* Cina Foroutan-Nejad\* and Abhik Ghosh\*

Symmetrized BLYP-D3/TZ2P Cartesian coordinates (Å)

#### Table of Contents

|    |                                     |   |
|----|-------------------------------------|---|
| 1. | H <sub>2</sub> Nc (C <sub>1</sub> ) | 2 |
| 2. | NiNc (C <sub>2v</sub> )             | 2 |
| 3. | NiDBNc (C <sub>2v</sub> )           | 3 |
| 4. | NiTBNc (D <sub>2h</sub> )           | 4 |

**1. H<sub>2</sub>Nc (C<sub>i</sub>)**

|   |              |              |              |
|---|--------------|--------------|--------------|
| C | 0.559682000  | -3.762876000 | -0.151823000 |
| C | 0.842799000  | 3.835846000  | 0.240017000  |
| C | 0.889001000  | -2.445179000 | 0.211427000  |
| C | 1.361614000  | 2.560056000  | -0.073401000 |
| C | 2.048260000  | -1.524366000 | 0.212510000  |
| C | 2.625252000  | 1.918210000  | 0.127302000  |
| C | 2.800927000  | 0.542551000  | 0.139111000  |
| C | 3.455184000  | -1.589045000 | 0.552408000  |
| C | 3.920801000  | -0.299102000 | 0.508252000  |
| C | -0.559682000 | 3.762876000  | 0.151823000  |
| C | -0.842799000 | -3.835846000 | -0.240017000 |
| C | -0.889001000 | 2.445179000  | -0.211427000 |
| C | -1.361614000 | -2.560056000 | 0.073401000  |
| C | -2.048260000 | 1.524366000  | -0.212510000 |
| C | -2.625252000 | -1.918210000 | -0.127302000 |
| C | -2.800927000 | -0.542551000 | -0.139111000 |
| C | -3.455184000 | 1.589045000  | -0.552408000 |
| C | -3.920801000 | 0.299102000  | -0.508252000 |
| H | 0.389429000  | 0.793837000  | -0.509587000 |
| H | 1.255840000  | -4.552808000 | -0.377565000 |
| H | 1.418435000  | 4.696177000  | 0.540775000  |
| H | 3.467720000  | 2.549074000  | 0.381683000  |
| H | 4.010046000  | -2.471462000 | 0.827878000  |
| H | 4.921692000  | 0.034042000  | 0.734991000  |
| H | -0.389429000 | -0.793837000 | 0.509587000  |
| H | -1.255840000 | 4.552808000  | 0.377565000  |
| H | -1.418435000 | -4.696177000 | -0.540775000 |
| H | -3.467720000 | -2.549074000 | -0.381683000 |
| H | -4.010046000 | 2.471462000  | -0.827878000 |
| H | -4.921692000 | -0.034042000 | -0.734991000 |
| N | 0.276835000  | 1.802895000  | -0.404277000 |
| N | 1.710795000  | -0.285950000 | -0.063597000 |
| N | -0.276835000 | -1.802895000 | 0.404277000  |
| N | -1.710795000 | 0.285950000  | 0.063597000  |

**2. NiNc (C<sub>2v</sub>)**

|   |             |              |              |
|---|-------------|--------------|--------------|
| C | 0.000000000 | 3.200711000  | -0.078438000 |
| C | 0.000000000 | -3.200711000 | -0.078438000 |
| C | 1.256168000 | 2.563542000  | 0.009514000  |
| C | 1.256168000 | -2.563542000 | 0.009514000  |
| C | 2.566530000 | 0.746749000  | 0.025937000  |
| C | 2.566530000 | -0.746749000 | 0.025937000  |
| C | 2.588977000 | 2.981463000  | -0.311045000 |
| C | 2.588977000 | -2.981463000 | -0.311045000 |
| C | 3.400830000 | 1.851761000  | -0.306773000 |

|    |              |              |              |
|----|--------------|--------------|--------------|
| C  | 3.400830000  | -1.851761000 | -0.306773000 |
| C  | -1.256168000 | 2.563542000  | 0.009514000  |
| C  | -1.256168000 | -2.563542000 | 0.009514000  |
| C  | -2.566530000 | 0.746749000  | 0.025937000  |
| C  | -2.566530000 | -0.746749000 | 0.025937000  |
| C  | -2.588977000 | 2.981463000  | -0.311045000 |
| C  | -2.588977000 | -2.981463000 | -0.311045000 |
| C  | -3.400830000 | 1.851761000  | -0.306773000 |
| C  | -3.400830000 | -1.851761000 | -0.306773000 |
| H  | 0.000000000  | 4.255761000  | -0.323446000 |
| H  | 0.000000000  | -4.255761000 | -0.323446000 |
| H  | 2.898850000  | 3.989407000  | -0.536678000 |
| H  | 2.898850000  | -3.989407000 | -0.536678000 |
| H  | 4.453784000  | 1.818049000  | -0.531945000 |
| H  | 4.453784000  | -1.818049000 | -0.531945000 |
| H  | -2.898850000 | 3.989407000  | -0.536678000 |
| H  | -2.898850000 | -3.989407000 | -0.536678000 |
| H  | -4.453784000 | 1.818049000  | -0.531945000 |
| H  | -4.453784000 | -1.818049000 | -0.531945000 |
| N  | 1.334340000  | 1.217871000  | 0.242969000  |
| N  | 1.334340000  | -1.217871000 | 0.242969000  |
| N  | -1.334340000 | 1.217871000  | 0.242969000  |
| N  | -1.334340000 | -1.217871000 | 0.242969000  |
| Ni | 0.000000000  | 0.000000000  | 0.365594000  |

### 3. NiDBNc ( $C_{2v}$ )

|   |             |              |              |
|---|-------------|--------------|--------------|
| C | 0.000000000 | 0.000000000  | 4.023968000  |
| C | 0.000000000 | 0.000000000  | -2.415645000 |
| C | 0.000000000 | 1.256938000  | 3.377205000  |
| C | 0.000000000 | 1.258517000  | -1.779111000 |
| C | 0.000000000 | 2.578061000  | 1.559471000  |
| C | 0.000000000 | 2.585664000  | 0.065244000  |
| C | 0.000000000 | 2.619023000  | 3.823865000  |
| C | 0.000000000 | 2.630965000  | -2.235667000 |
| C | 0.000000000 | 3.219020000  | -3.500107000 |
| C | 0.000000000 | 3.438633000  | 2.697004000  |
| C | 0.000000000 | 3.470183000  | -1.060776000 |
| C | 0.000000000 | 4.600270000  | -3.597884000 |
| C | 0.000000000 | 4.862095000  | -1.185832000 |
| C | 0.000000000 | 5.415872000  | -2.452413000 |
| C | 0.000000000 | -1.256938000 | 3.377205000  |
| C | 0.000000000 | -1.258517000 | -1.779111000 |
| C | 0.000000000 | -2.578061000 | 1.559471000  |
| C | 0.000000000 | -2.585664000 | 0.065244000  |
| C | 0.000000000 | -2.619023000 | 3.823865000  |
| C | 0.000000000 | -2.630965000 | -2.235667000 |
| C | 0.000000000 | -3.219020000 | -3.500107000 |
| C | 0.000000000 | -3.438633000 | 2.697004000  |
| C | 0.000000000 | -3.470183000 | -1.060776000 |

|    |             |              |              |
|----|-------------|--------------|--------------|
| C  | 0.000000000 | -4.600270000 | -3.597884000 |
| C  | 0.000000000 | -4.862095000 | -1.185832000 |
| C  | 0.000000000 | -5.415872000 | -2.452413000 |
| H  | 0.000000000 | 0.000000000  | 5.107167000  |
| H  | 0.000000000 | 0.000000000  | -3.498805000 |
| H  | 0.000000000 | 2.607918000  | -4.393955000 |
| H  | 0.000000000 | 2.949079000  | 4.850423000  |
| H  | 0.000000000 | 4.515758000  | 2.689949000  |
| H  | 0.000000000 | 5.064904000  | -4.575334000 |
| H  | 0.000000000 | 5.494121000  | -0.307153000 |
| H  | 0.000000000 | 6.491504000  | -2.568619000 |
| H  | 0.000000000 | -2.607918000 | -4.393955000 |
| H  | 0.000000000 | -2.949079000 | 4.850423000  |
| H  | 0.000000000 | -4.515758000 | 2.689949000  |
| H  | 0.000000000 | -5.064904000 | -4.575334000 |
| H  | 0.000000000 | -5.494121000 | -0.307153000 |
| H  | 0.000000000 | -6.491504000 | -2.568619000 |
| N  | 0.000000000 | 1.322916000  | 2.012740000  |
| N  | 0.000000000 | 1.341663000  | -0.414420000 |
| N  | 0.000000000 | -1.322916000 | 2.012740000  |
| N  | 0.000000000 | -1.341663000 | -0.414420000 |
| Ni | 0.000000000 | 0.000000000  | 0.792767000  |

#### 4. NiTBNC ( $D_{2h}$ )

|   |             |              |              |
|---|-------------|--------------|--------------|
| C | 0.000000000 | 0.000000000  | 3.221326000  |
| C | 0.000000000 | 0.000000000  | -3.221326000 |
| C | 0.000000000 | 1.239464000  | 2.537698000  |
| C | 0.000000000 | 1.239464000  | -2.537698000 |
| C | 0.000000000 | 2.616050000  | 0.692493000  |
| C | 0.000000000 | 2.616050000  | -0.692493000 |
| C | 0.000000000 | 2.641545000  | 3.008616000  |
| C | 0.000000000 | 2.641545000  | -3.008616000 |
| C | 0.000000000 | 3.183666000  | 4.279735000  |
| C | 0.000000000 | 3.183666000  | -4.279735000 |
| C | 0.000000000 | 3.487408000  | 1.857835000  |
| C | 0.000000000 | 3.487408000  | -1.857835000 |
| C | 0.000000000 | 4.571718000  | 4.420104000  |
| C | 0.000000000 | 4.571718000  | -4.420104000 |
| C | 0.000000000 | 4.865416000  | 2.012438000  |
| C | 0.000000000 | 4.865416000  | -2.012438000 |
| C | 0.000000000 | 5.398617000  | 3.300171000  |
| C | 0.000000000 | 5.398617000  | -3.300171000 |
| C | 0.000000000 | -1.239464000 | 2.537698000  |
| C | 0.000000000 | -1.239464000 | -2.537698000 |
| C | 0.000000000 | -2.616050000 | 0.692493000  |
| C | 0.000000000 | -2.616050000 | -0.692493000 |
| C | 0.000000000 | -2.641545000 | 3.008616000  |
| C | 0.000000000 | -2.641545000 | -3.008616000 |
| C | 0.000000000 | -3.183666000 | 4.279735000  |
| C | 0.000000000 | -3.183666000 | -4.279735000 |

|    |             |              |              |
|----|-------------|--------------|--------------|
| C  | 0.000000000 | -3.487408000 | 1.857835000  |
| C  | 0.000000000 | -3.487408000 | -1.857835000 |
| C  | 0.000000000 | -4.571718000 | 4.420104000  |
| C  | 0.000000000 | -4.571718000 | -4.420104000 |
| C  | 0.000000000 | -4.865416000 | 2.012438000  |
| C  | 0.000000000 | -4.865416000 | -2.012438000 |
| C  | 0.000000000 | -5.398617000 | 3.300171000  |
| C  | 0.000000000 | -5.398617000 | -3.300171000 |
| H  | 0.000000000 | 0.000000000  | 4.300586000  |
| H  | 0.000000000 | 0.000000000  | -4.300586000 |
| H  | 0.000000000 | 2.543791000  | 5.152568000  |
| H  | 0.000000000 | 2.543791000  | -5.152568000 |
| H  | 0.000000000 | 5.010286000  | 5.409116000  |
| H  | 0.000000000 | 5.010286000  | -5.409116000 |
| H  | 0.000000000 | 5.520466000  | 1.152226000  |
| H  | 0.000000000 | 5.520466000  | -1.152226000 |
| H  | 0.000000000 | 6.472876000  | 3.430606000  |
| H  | 0.000000000 | 6.472876000  | -3.430606000 |
| H  | 0.000000000 | -2.543791000 | 5.152568000  |
| H  | 0.000000000 | -2.543791000 | -5.152568000 |
| H  | 0.000000000 | -5.010286000 | 5.409116000  |
| H  | 0.000000000 | -5.010286000 | -5.409116000 |
| H  | 0.000000000 | -5.520466000 | 1.152226000  |
| H  | 0.000000000 | -5.520466000 | -1.152226000 |
| H  | 0.000000000 | -6.472876000 | 3.430606000  |
| H  | 0.000000000 | -6.472876000 | -3.430606000 |
| N  | 0.000000000 | 1.315470000  | 1.207744000  |
| N  | 0.000000000 | 1.315470000  | -1.207744000 |
| N  | 0.000000000 | -1.315470000 | 1.207744000  |
| N  | 0.000000000 | -1.315470000 | -1.207744000 |
| Ni | 0.000000000 | 0.000000000  | 0.000000000  |
